# Supplementary material for: Racial Residential Segregation and Race Differences in Ideal Cardiovascular Health among Young Men
Source: MDPI journal article supplement (doi:10.3390/ijerph18157755), 2021-07-22
Supplement: s1 [file s1]

**Table S1.** Cardiovascular health: Ideal, intermediate, and poor thresholds of the Life's Simple 7 targets.

| Data source: Add Health (Wave IV) |                                                                                                                     |                                                    |                                                                                        |
|-----------------------------------|---------------------------------------------------------------------------------------------------------------------|----------------------------------------------------|----------------------------------------------------------------------------------------|
|                                   | <i>Ideal</i>                                                                                                        | <i>Intermediate</i>                                | <i>Poor</i>                                                                            |
| Diet                              | <4 sugary beverages/week                                                                                            | 5-7 sugary beverages per week                      | 8+ sugary beverages per week                                                           |
| Physical activity                 | 5+ activities weekly                                                                                                | 1-4 activities weekly                              | 0 activities                                                                           |
| Smoking                           | Never smoked regularly                                                                                              | Smoked in the past year                            | Current smoker                                                                         |
| Body mass index                   | <25 kg/m <sup>2</sup>                                                                                               | 25 - 29.9 kg/m <sup>2</sup>                        | 30+ kg/m <sup>2</sup>                                                                  |
| Blood pressure                    | <120 SBP and <80 DBP (no medication use/no prior diagnosis)                                                         | SBP 120-139 or DBP 80-89 or treated to ideal level | > 140 SBP or > 90 DBP or treated to less than ideal                                    |
| Total cholesterol                 | Bottom seven deciles (no medication use/no prior diagnosis)                                                         | 8th and 9th deciles or treated to ideal            | Top decile                                                                             |
| Glucose                           | HbA1c<5.7% and fasting glucose <100 mg/dL or non-fasting glucose<200 mg/dL and no medication use/no prior diagnosis | 5.7 - 6.4% HbA1c or 100-125 mg/dL fasting glucose  | 6.5+ HbA1c or 126+ fasting glucose or 200+ non-fasting glucose or diabetic medications |
